# Supplementary material for: Control of molecular orientations of poly(3-hexylthiophene) on self-assembled monolayers: molecular dynamics simulations
Source: Royal Society of Chemistry journal article supplement (doi:10.1039/c3cp44150d), 2013-01-01
Supplement: c3cp44150d.pdf [file c3cp44150d.pdf]

## Supporting Information

### Control of Molecular Orientations of Poly(3-hexylthiophene) on Self-Assembled Monolayers: Molecular Dynamics Simulations

Shigeaki Obata, Yukihiro Shimoi\*

Nanosystem Research Institute (NRI), National Institute of Advanced Industrial Science and Technology  
(AIST), Tsukuba Central 2, 1-1-1 Umezono, Tsukuba, Ibaraki 305-8568, Japan.

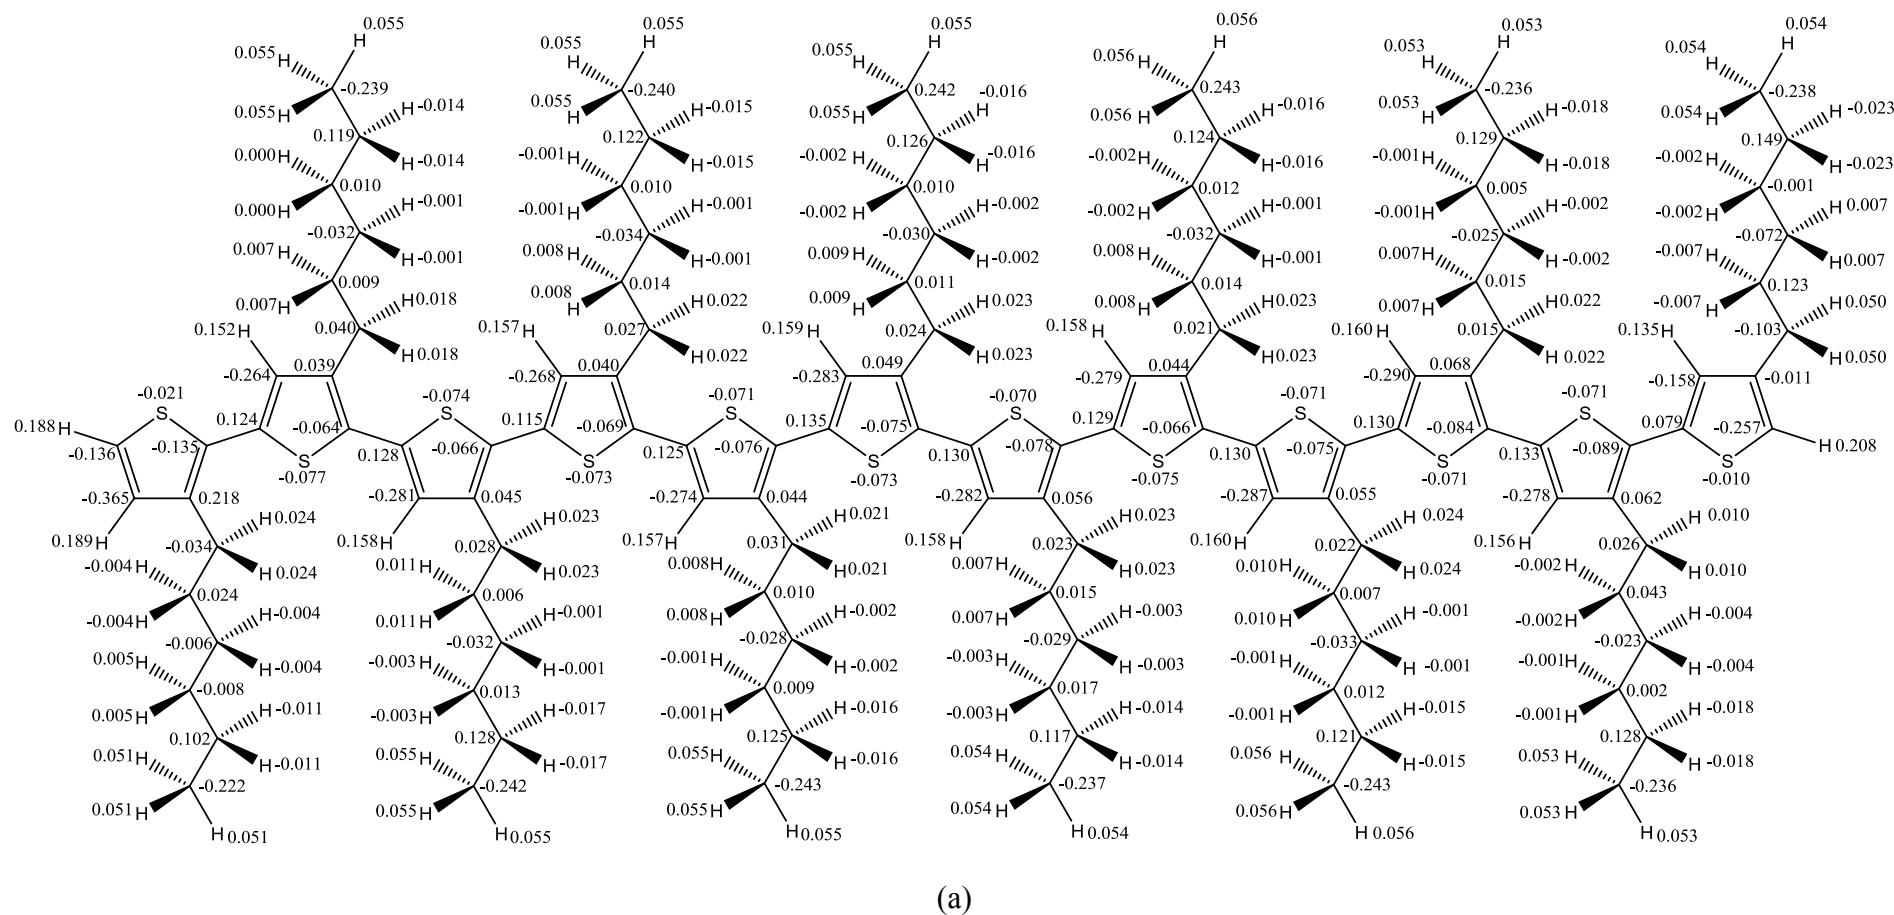

Figure S1. Atomic charges for the (a) O3HT, (b) liner alkane, and (c) NH<sub>2</sub>-terminated molecule used in MD simulations. For the evaluation method of the atomic charges, see Sec. 2 in the main text.

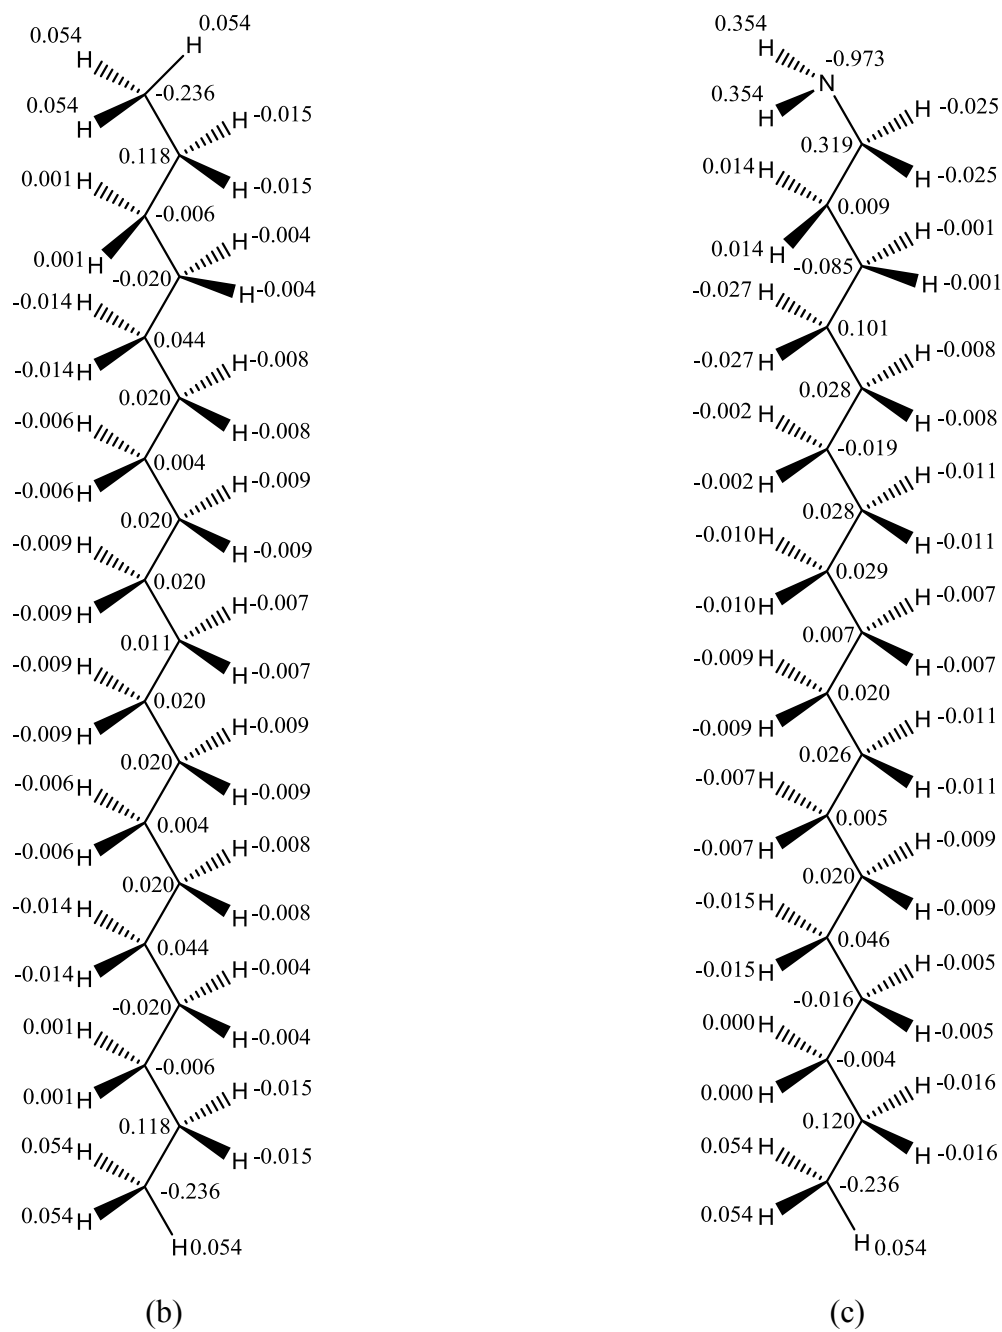

Figure S1. Continued.

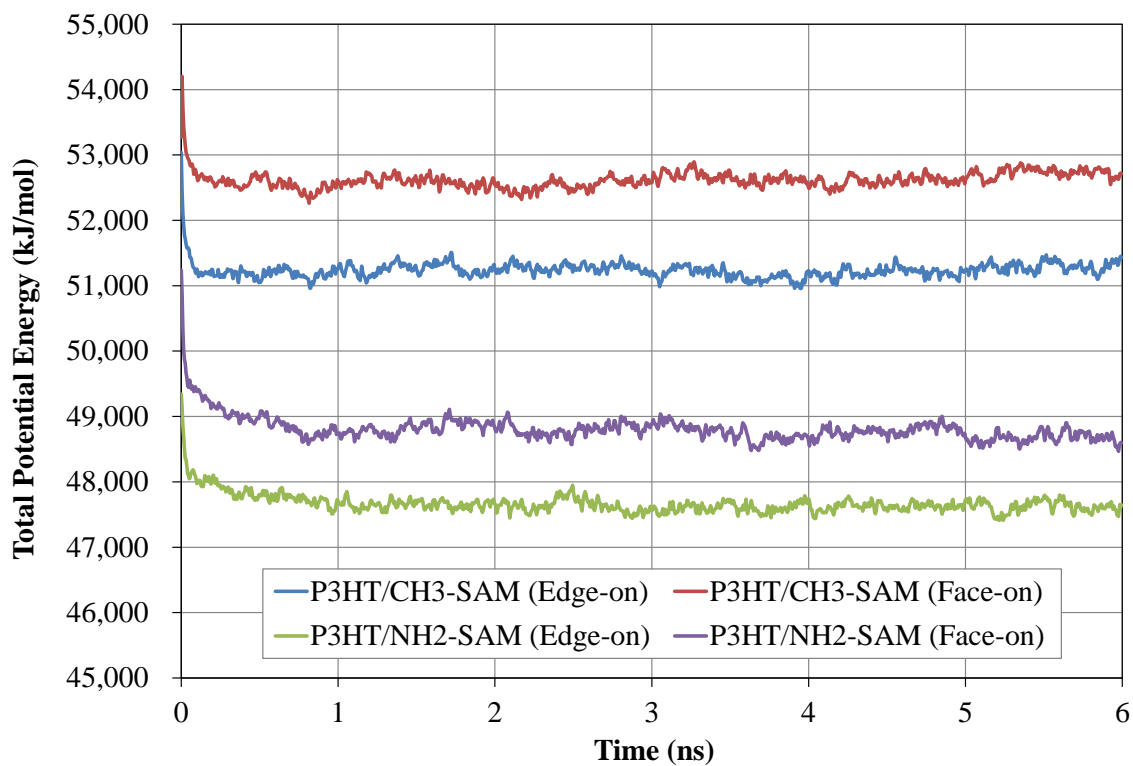

Figure S2. Total potential energies as a function of simulation time for the model systems of P3HT on the CH<sub>3</sub>-terminated and NH<sub>2</sub>-terminated SAMs.

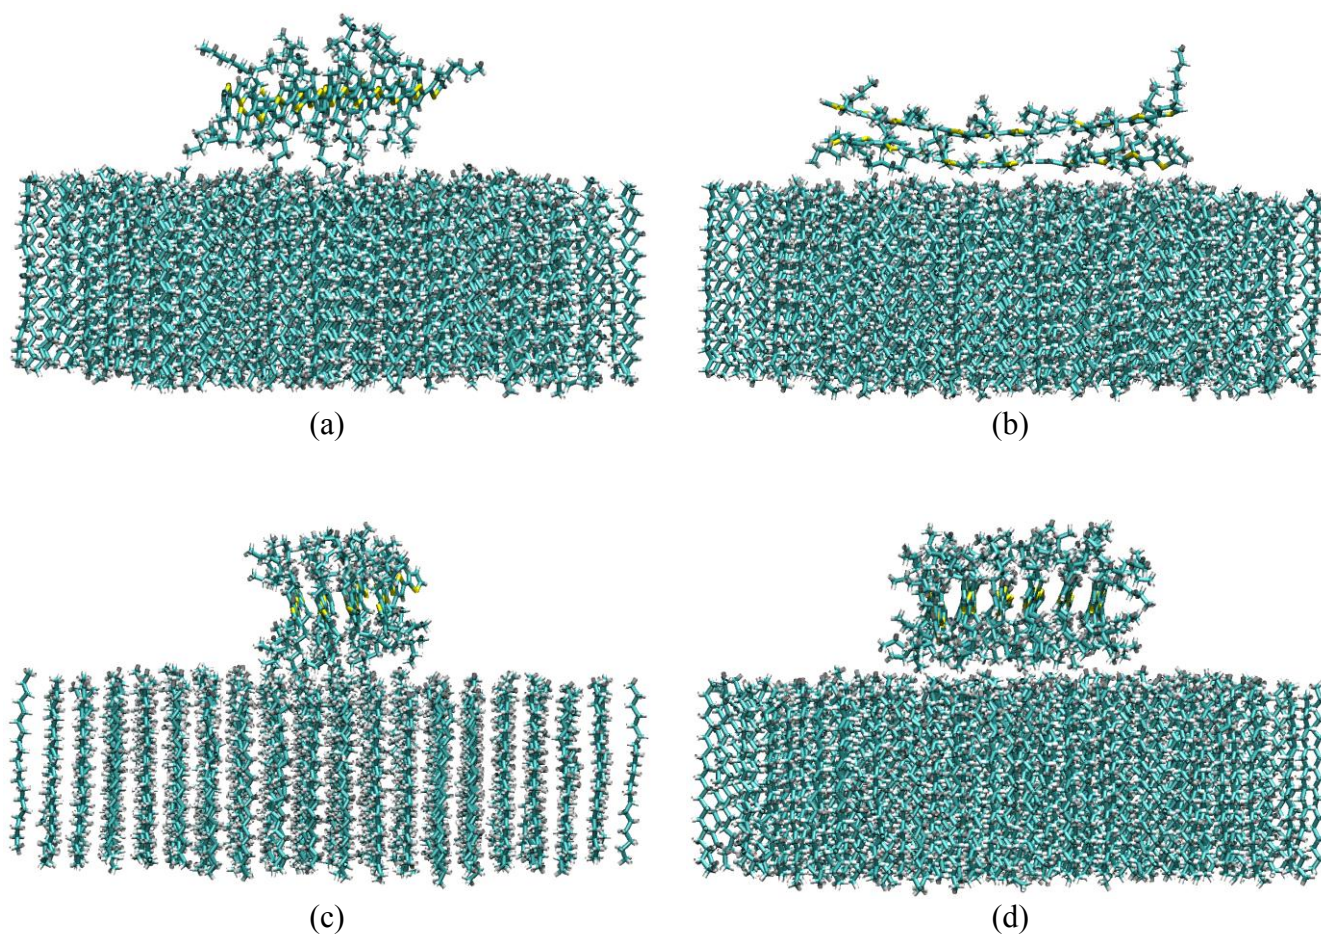

Figure S3. MD snapshots of simulation for the systems with a limited number of O3HT molecules. In (a)-(d), the SAM system is the CH<sub>3</sub>-terminated SAM and the number of stacked O3HT molecules are two (a and b), four (c), and six (d). Panels (e)-(g) show the systems of two-, four-, and six-stacked O3HTs and the NH<sub>2</sub>-terminated SAM, respectively. The simulation time is at 1.2 ns for (a) and 4 ns for the other panels. The O3HT takes the face-on orientation in (b) and (d) and the edge-on orientation in the other panels.

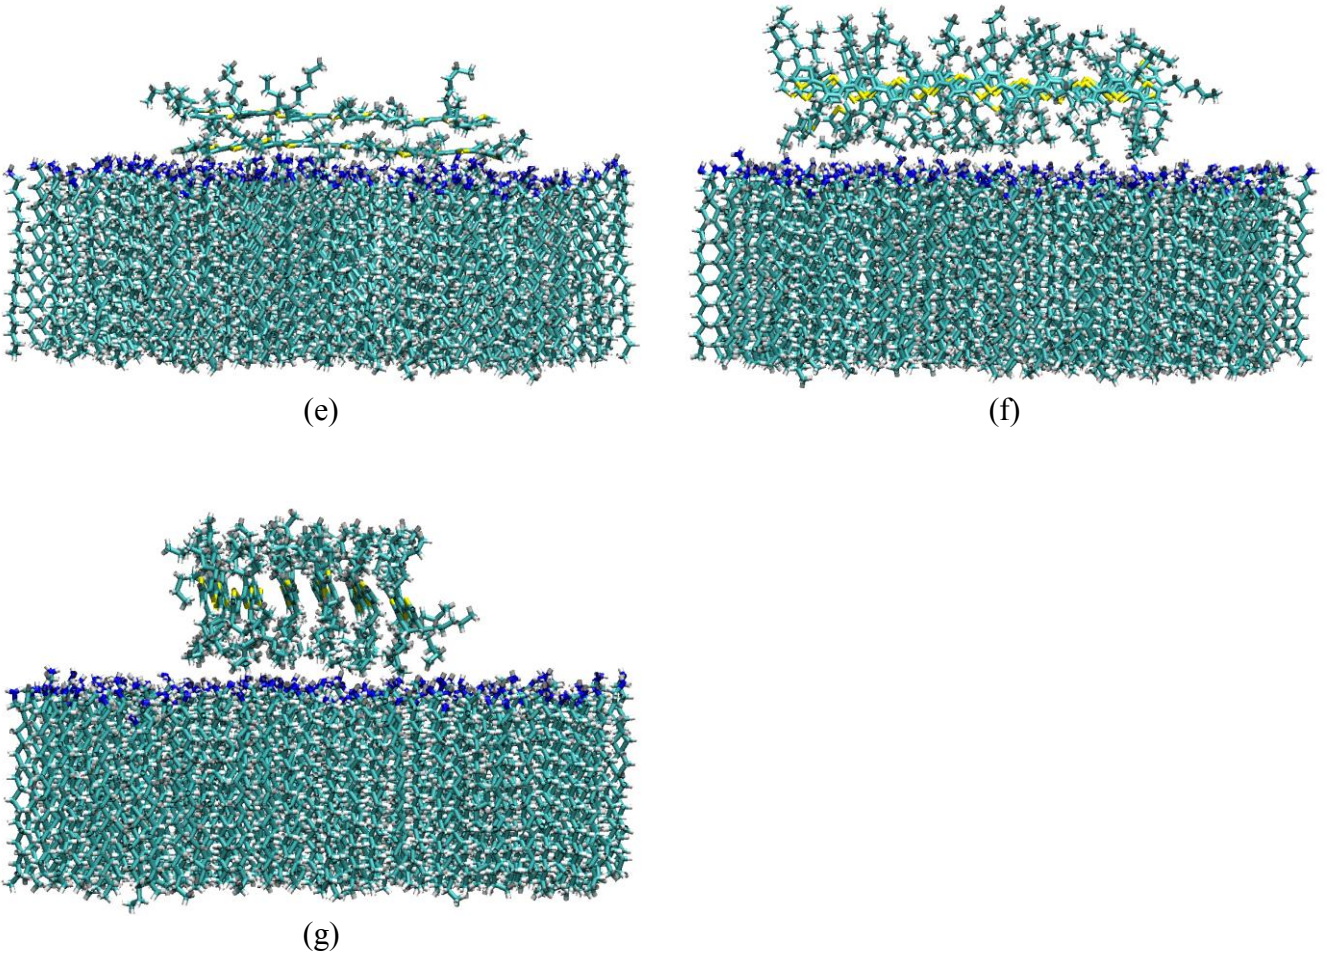

Figure S3. Continued.
